# Supplementary material
Source: MDPI journal article supplement (https://www.mdpi.com/2673-4591/10/1/13)
Supplement: s1 [file s1]

# Microfluidic devices with selectable optical pathlength for quality control of alcoholic solutions

Elisabetta BODO and Valentina BELLO

*Laboratory of ElectroOptics*

*Department of Electrical, Computer and Biomedical Engineering*

*University of Pavia, Pavia, Italy*

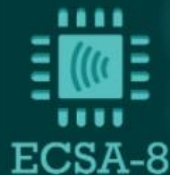

**The 8th International Electronic Conference on  
Sensors and Applications**

01-15 NOVEMBER 2021 | ONLINE

**(Student Session)**

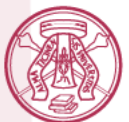

UNIVERSITÀ DI PAVIA

# Goal of the work

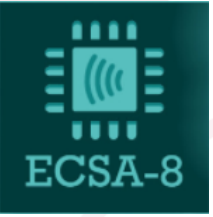

## DEVELOPMENT OF A MICRO-OPTO-FLUIDIC PLATFORM BASED ON RECTANGULAR GLASS MICRO-CAPILLARIES WITH INTEGRATED REFLECTORS FOR THE IDENTIFICATION OF FLUIDS EXPLOITING THEIR ABSORPTION PROPERTIES

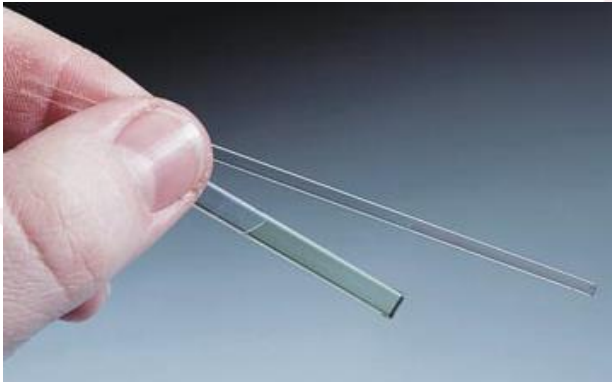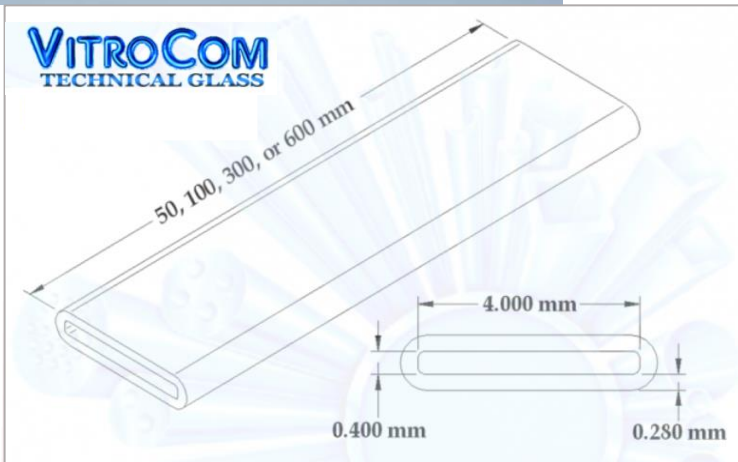

### Features of rectangular glass micro-capillaries:

- **Low-cost devices**, commercially available in several formats
- Composition: **borosilicate glass** BK7. Refractive index: 1.5 @ 1550 nm
- **Biocompatible** material → suitable for analyses on biological fluids
- Analysis of **ultra-low volumes** ( $\mu\text{L}$  or nL) of fluids
- Suitable for **contactless, remote** and **non-invasive** optical investigation
- **Reduction of light scattering** typical with round section capillaries

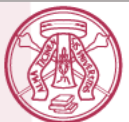

# Micro-opto-fluidic setup – Previous work

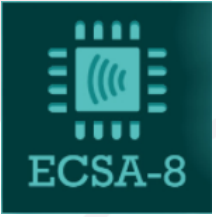

In a **previous work**, we exploited micro-capillaries laid onto a bulk mirror for testing the absorption features of pure fluid sample in the Near Infra-Red (NIR) wavelength region\*

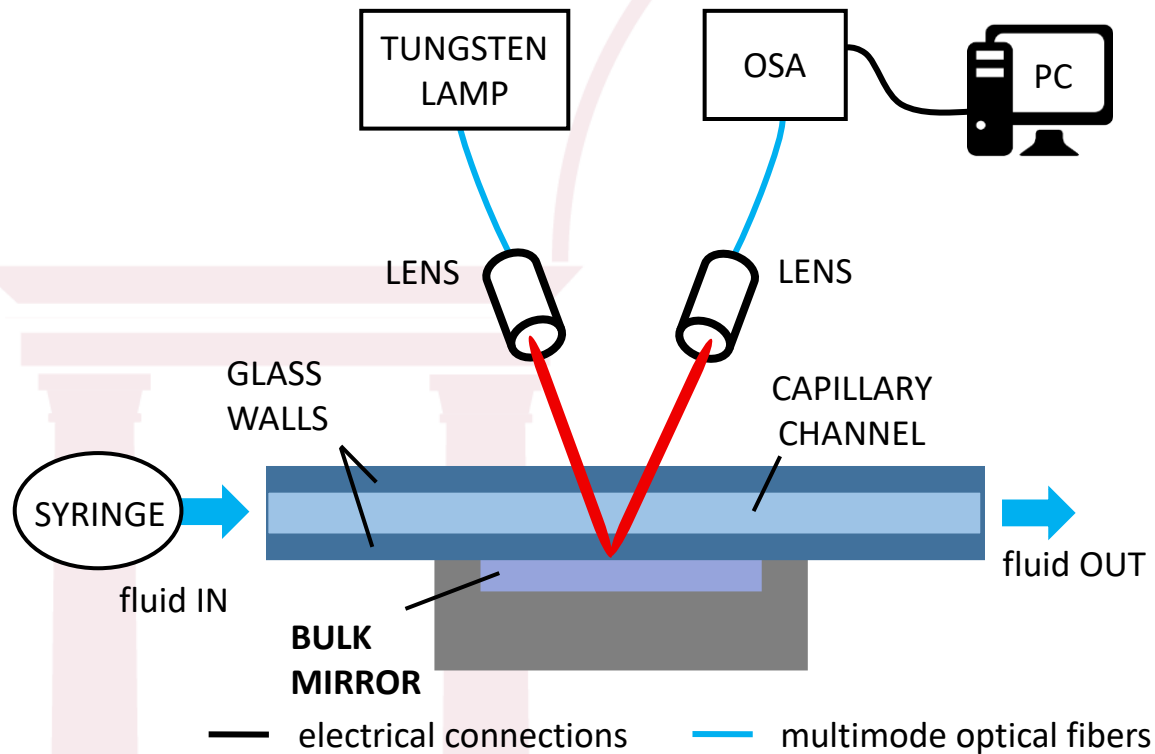

- Light crosses the capillary only twice
- The results were promising, **BUT** the structure was difficult to handle and not suitable for implementing sensing platform
- Sensitivity is limited

\* Bello, V. and Bodo, E. **A NIR-spectroscopy-based approach for detection of fluids in rectangular glass micro-capillaries.** *Engineering Proceedings* **2020**, 2, 43 DOI: 10.3390/ecsa-7-08250

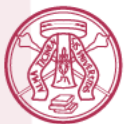

# Micro-opto-fluidic setup – This work



Hence, in this work

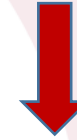

We exploited a micro-capillary provided with integrated external reflectors

- Compact micro-device
- Simple and low-cost technology
- Selectable pathlength<sup>#</sup>
- Light can cross the capillary multiple times → sensitivity is enhanced
- Suitable for sensing purpose (pure substances and mixtures)

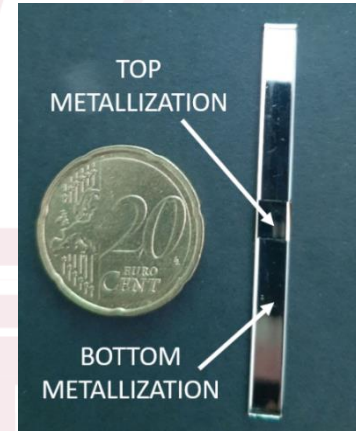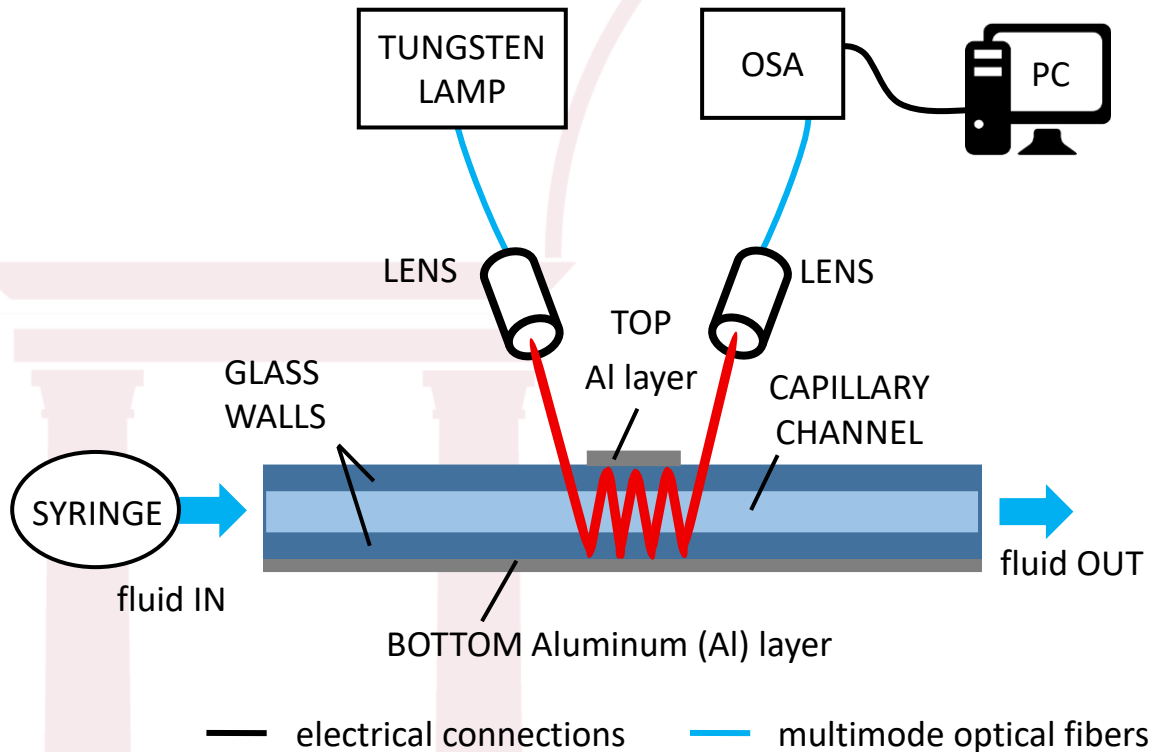

<sup>#</sup> Bello, V., Bodo, E. and Merlo, S. **Near infrared absorption spectroscopy in microfluidic devices with selectable pathlength**, *IEEE/OSA Journal of Lightwave Technology* **2021**, 39, 4193-4200 DOI: 10.1109/JLT.2020.3040488

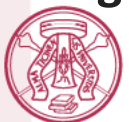

# Theoretical model

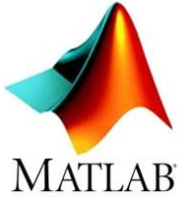

Beer-Lambert law

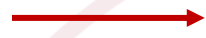

$$T_{abs}(\lambda) = e^{-\alpha(\lambda) \cdot B}$$

$$\alpha(\lambda) = \frac{4 \cdot \pi \cdot k(\lambda)}{\lambda}$$

Snell law and Fresnel formulas

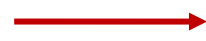

transmission coefficient for the power at each interface

$$T_{sample}(\lambda) = \frac{P_{out, sample}(\lambda)}{P_{in}(\lambda)}$$

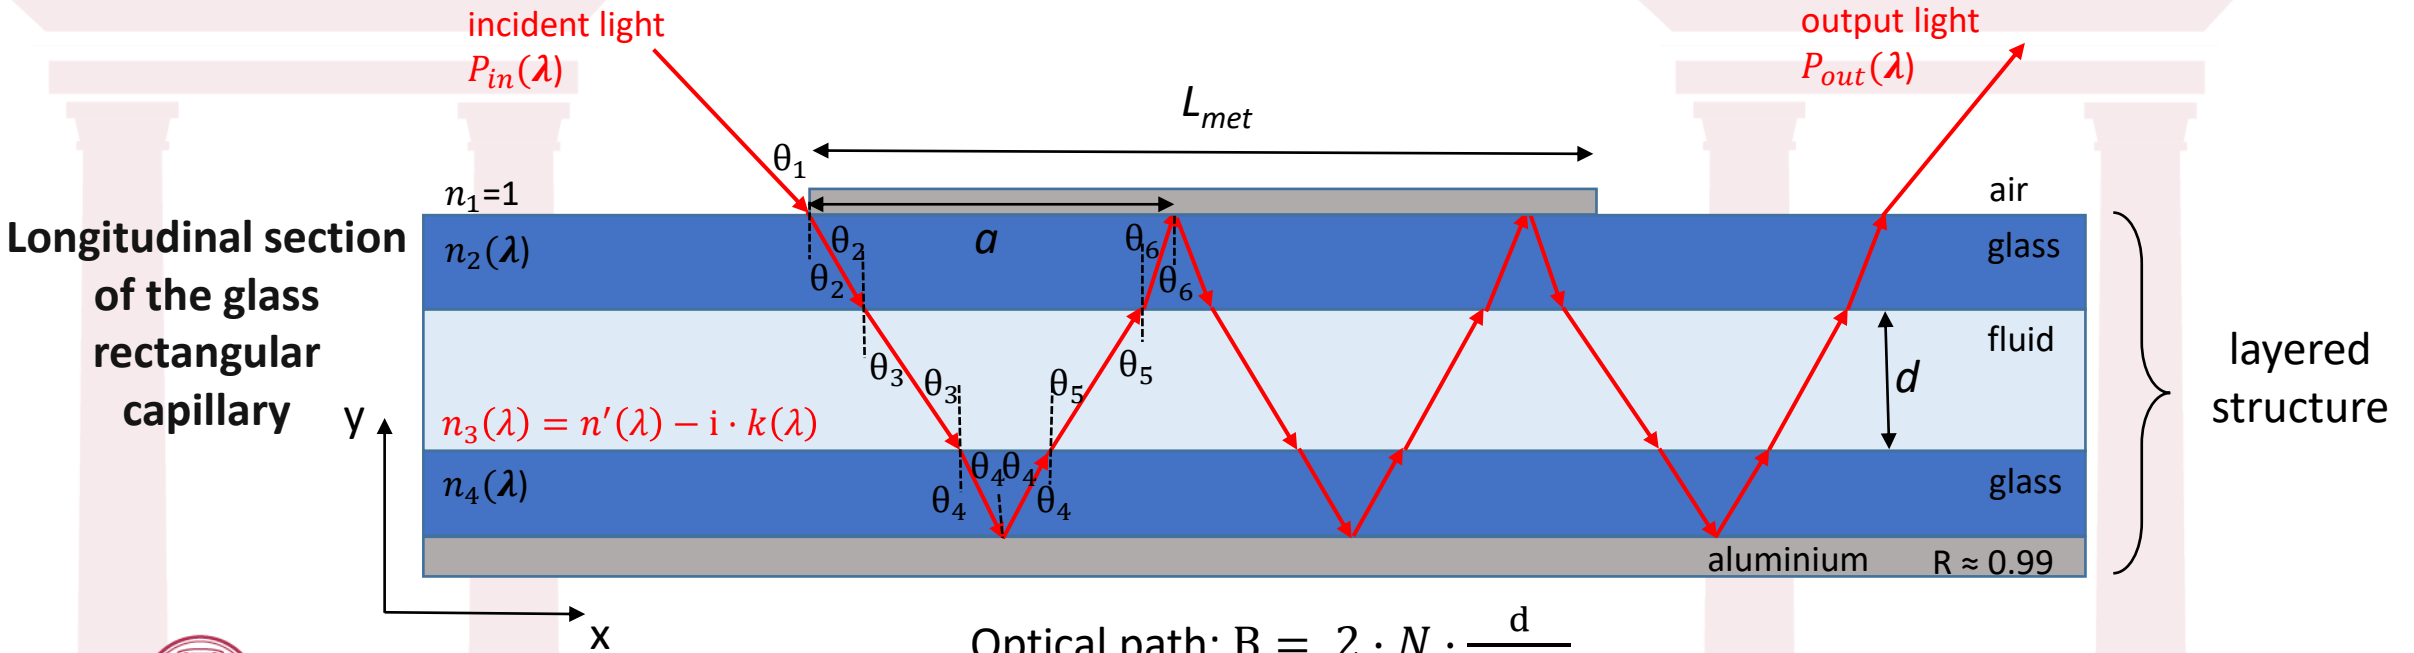

$$\text{Optical path: } B = 2 \cdot N \cdot \frac{d}{\cos \theta_3}$$

$$\text{Number of bounces: } N = \frac{L_{met}}{a}$$

In the scheme:  $N = 3$



UNIVERSITÀ DI PAVIA

# Theoretical model – Results



With the multiple bounce configuration the sensitivity increases.

It allows to observe more details of the transmitted power spectra.

## Law of additivity of absorbances

$$n_{3,mixture} = n_i \cdot p_i + n_j \cdot p_j$$

$n_{i,j}$  = real part of the refractive indices

$p_{i,j}$  = fractional volume concentrations

$A_{i,j}$  = absorbance of the fluids contained in the mixture

$$A_{mixture} = A_i \cdot p_i + A_j \cdot p_j$$

$$T_{mixture}(\lambda) = \frac{1}{10^{A_{mixture}(\lambda)}}$$

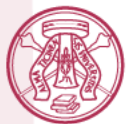

UNIVERSITÀ DI PAVIA

NOTE: same y-axis for direct comparison

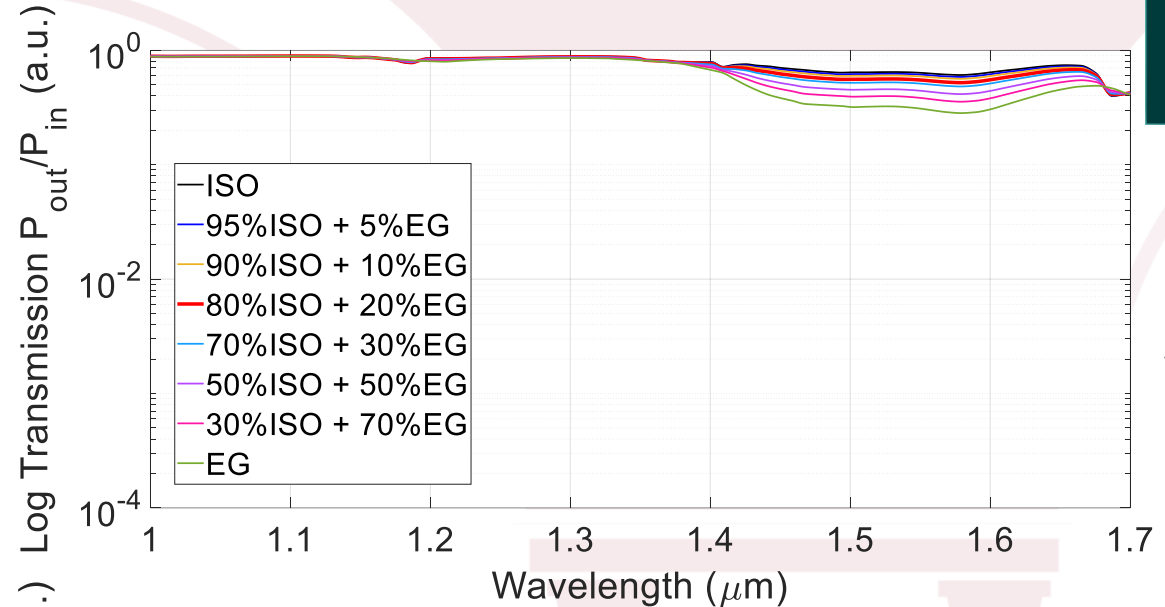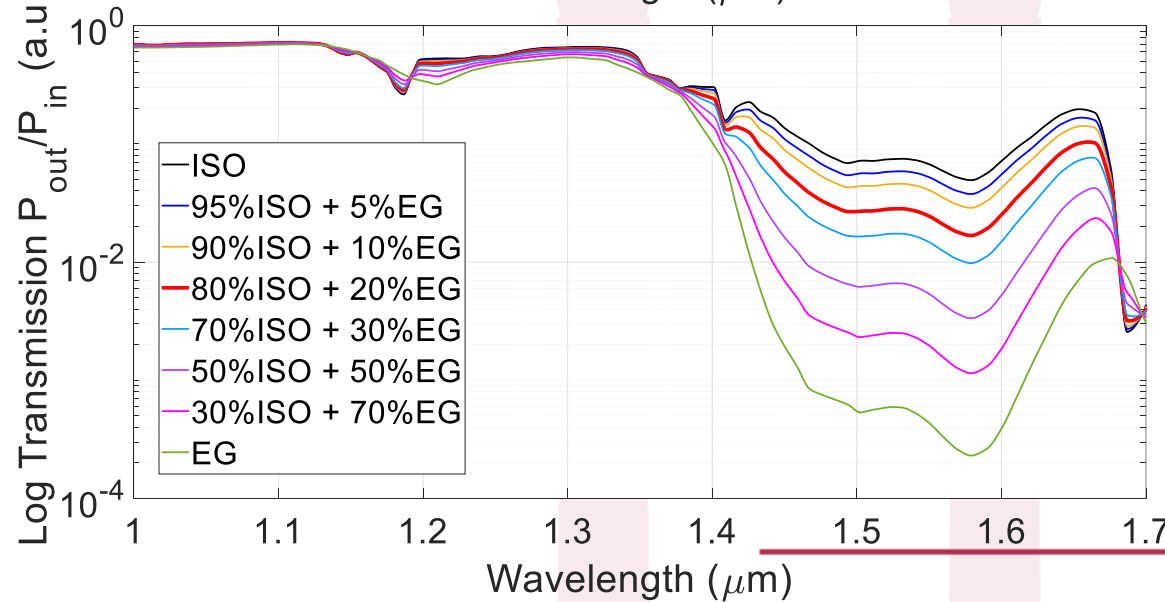

Multiple (7) bounces



# Spectral analysis

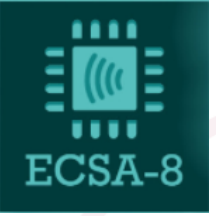

Experimental measurements were carried out by filling the channel with **mixtures** of **ethylene glycol (EG)** and **isopropanol (ISO)** in different volume concentrations.

For increasing ethylene glycol concentration, the transmitted power between 1.4  $\mu\text{m}$  and 1.6  $\mu\text{m}$  decreases since ethylene glycol does exhibit two absorption bands around 1.46  $\mu\text{m}$  and 1.57  $\mu\text{m}$

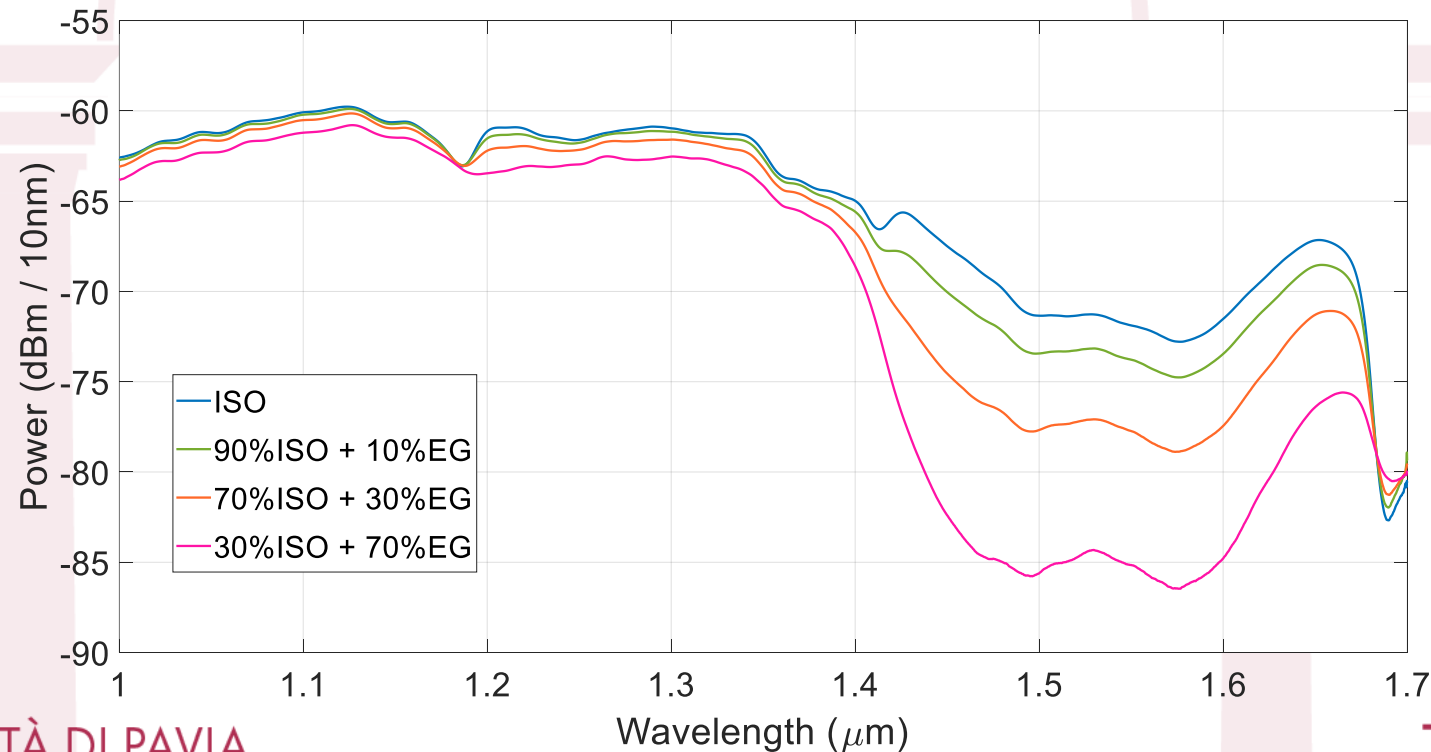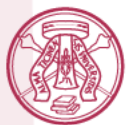

# Implementation of the optical sensor based on amplitude detection



Extraction of ethylene glycol content:

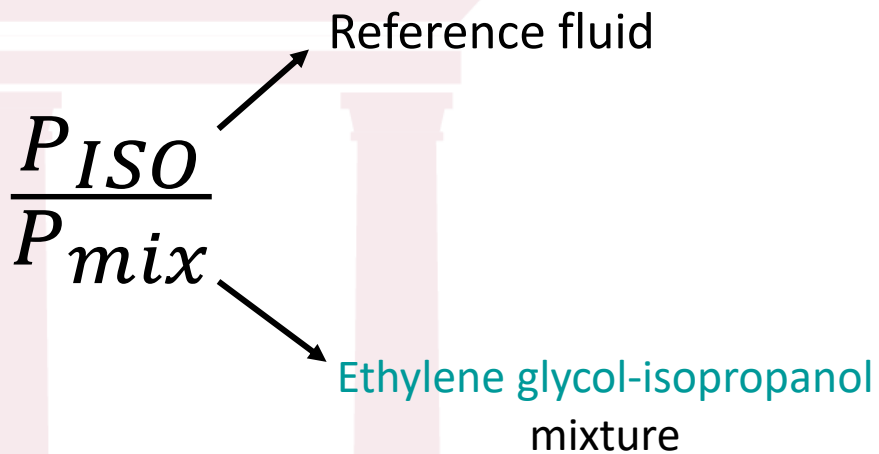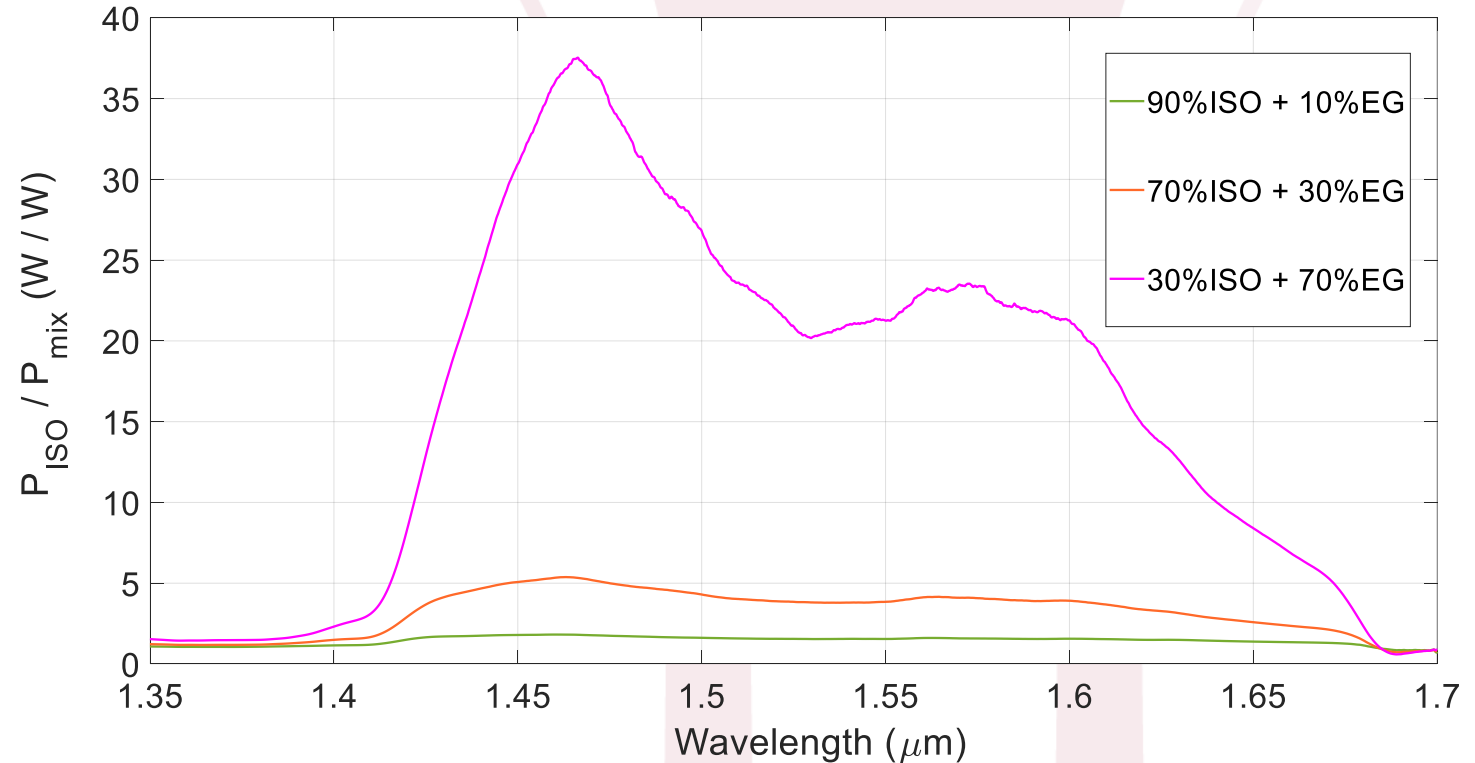



# Implementation of the optical sensor based on amplitude detection

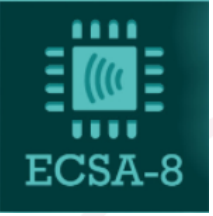

Responsivity  $R_{1.46/1.35} = \text{Log} \left( \frac{P_{out}(1.46 \mu\text{m})}{P_{out}(1.35 \mu\text{m})} \right)$   experimental calibration curve

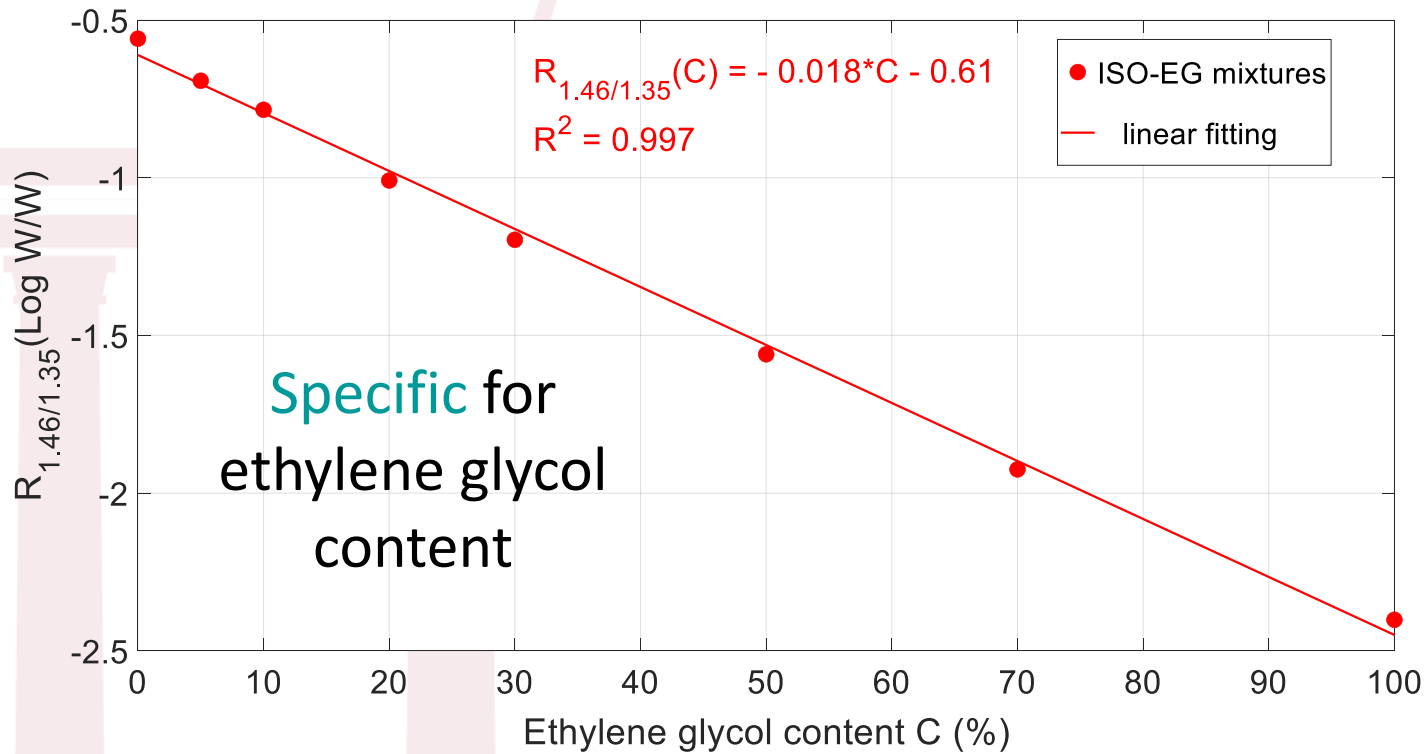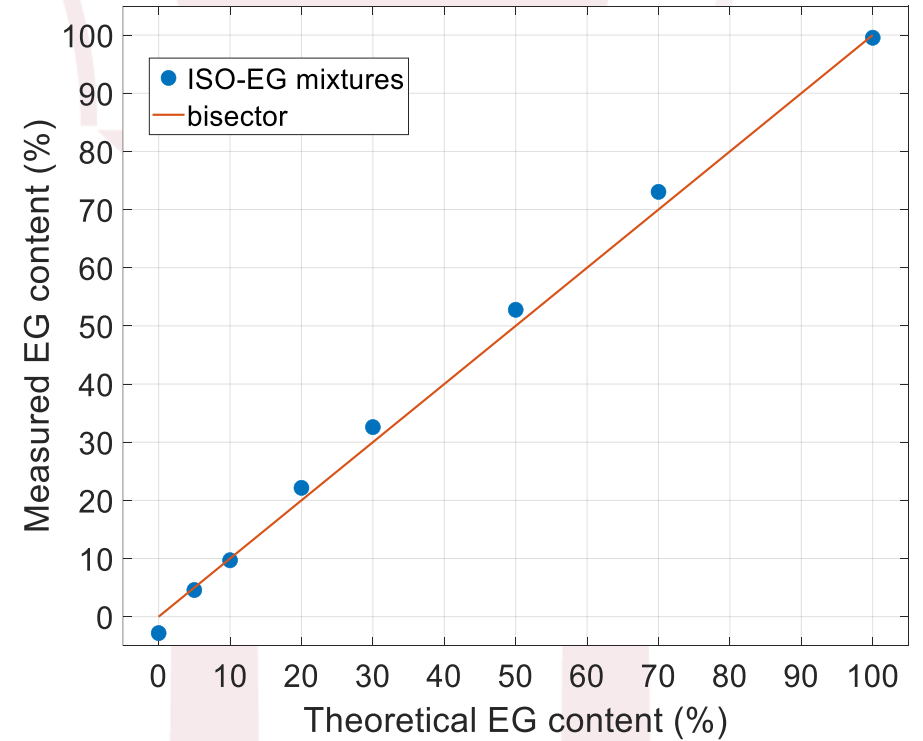

# Conclusions

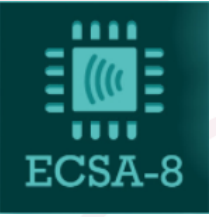

In this work, we have reported a smart and compact **micro-opto-fluidic platform** based on **rectangular glass micro-capillaries** for detection of fluids based on their **spectroscopic features**.

The micro-capillary is provided with **integrated reflectors** and light emitted by a **tungsten lamp** crosses the channel containing the sample multiple times.

Mixtures of isopropanol and ethylene glycol at different concentrations were **distinguished** thanks to their absorption profiles.

We have identified the two-wavelength ratio as **responsivity parameter** of the sensor: the **specificity** for ethylene glycol content detection has been verified.

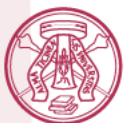



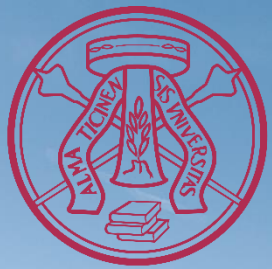

UNIVERSITÀ  
DI PAVIA

THANK YOU FOR  
YOUR KIND ATTENTION!

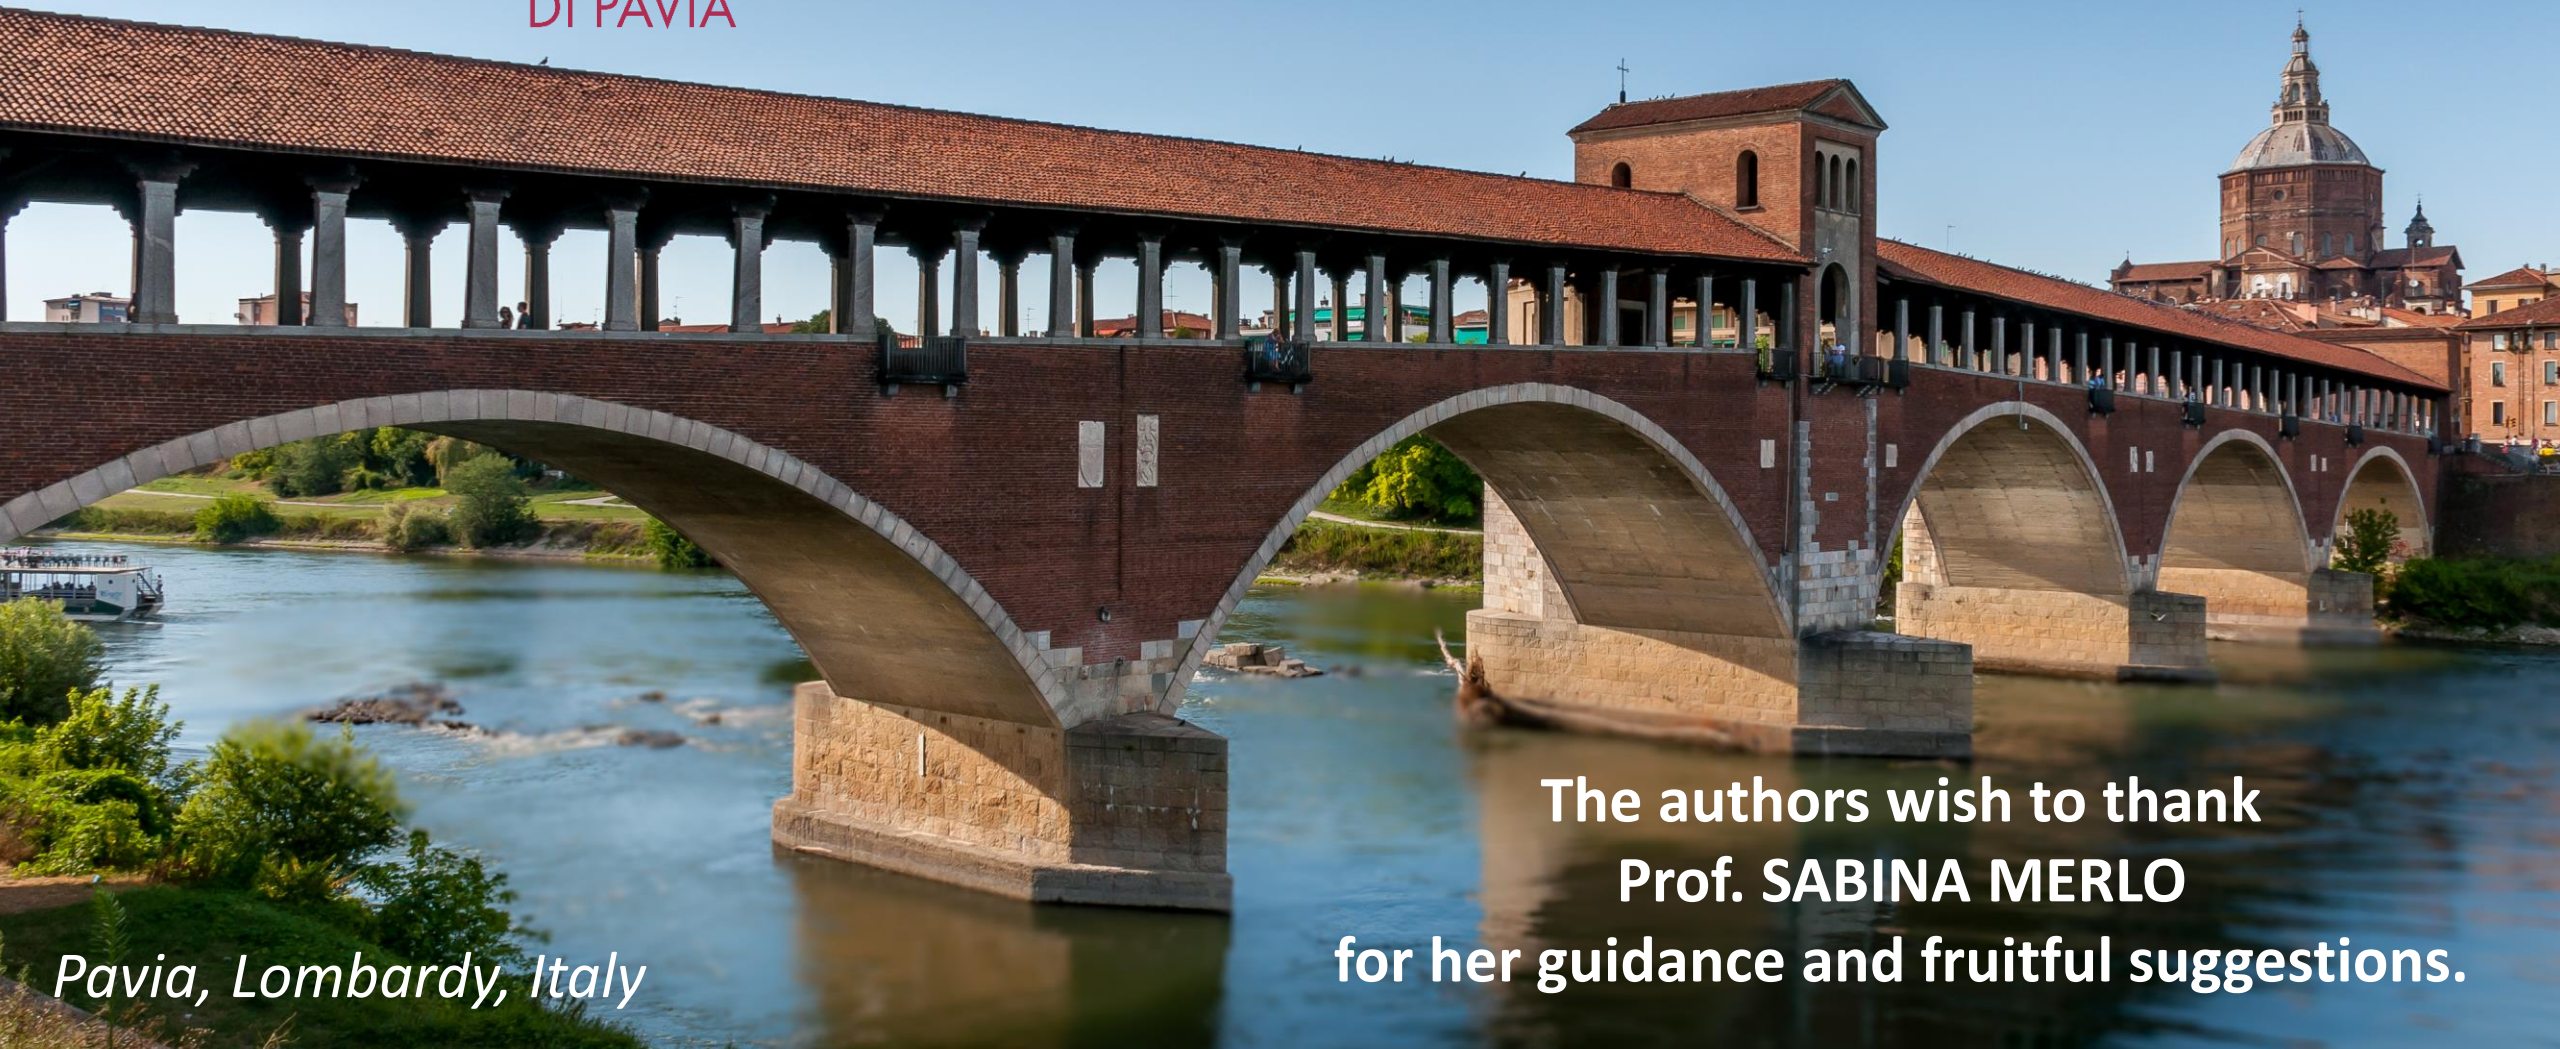

The authors wish to thank  
**Prof. SABINA MERLO**  
for her guidance and fruitful suggestions.

*Pavia, Lombardy, Italy*
